# Supplementary material for: G3BPs tether the TSC complex to lysosomes and suppress mTORC1 signaling
Source: PubMed Central journal article supplement — Cell. 2021 Feb 4;184(3):655–674.e27. doi: 10.1016/j.cell.2020.12.024 (PMC7868890; doi:10.1016/j.cell.2020.12.024), 2021-02-04
Supplement: mmc1.pdf [file mmc1.pdf]

## Supplemental Information

### **G3BPs tether the TSC complex to lysosomes and suppress mTORC1 signaling**

Mirja Tamara Prentzell, Ulrike Rehbein, Marti Cadena Sandoval, Ann-Sofie De Meulemeester, Ralf Baumeister, Laura Brohée, Bianca Berdel, Mathias Bockwoldt, Bernadette Carroll, Suvagata Roy Chowdhury, Andreas von Deimling, Constantinos Demetriades, Gianluca Figlia, Genomics England Research Consortium, Mariana Eca Guimaraes de Araujo, Alexander M. Heberle, Ines Heiland, Birgit Holzwarth, Lukas A. Huber, Jacek Jaworski, Magdalena Kedra, Katharina Kern, Andrii Kopach, Viktor I. Korolchuk, Ineke van 't Land-Kuper, Matylda Macias, Mark Nellist, Wilhelm Palm, Stefan Pusch, Jose Miguel Ramos Pittol, Michèle Reil, Anja Reintjes, Friederike Reuter, Julian R. Sampson, Chloë Scheldeman, Aleksandra Siekierska, Eduard Stefan, Aurelio A. Teleman, Laura E. Thomas, Omar Torres-Quesada, Saskia Trump, Hannah D. West, Peter de Witte, Sandra Woltering, Teodor E. Yordanov, Justyna Zmorzynska, Christiane A. Opitz, and Kathrin Thedieck

**Table S1. siRNA, shRNA, and sgRNA targeting sequences mapped on the nucleotide sequence of G3BP1, related to Figure 1.** The targeting sequences of the four different siRNAs from the G3BP1 siRNA pool (light green), two shRNA sequences against G3BP1 (dark green), and the two sgRNAs used for CRISPR/Cas9 mediated knockout (orange) are highlighted.

|                                                                                                        |                             |
|--------------------------------------------------------------------------------------------------------|-----------------------------|
| 5' UTR - <b>CCGGCGACCTTCCGGCGGGA</b> ... (15689bp)                                                     |                             |
| ATGGTGATGGAGAAGCCTAGTCCCCTGCTGGTCCGGCGGGAATTTGTGAGACAGTATTACACACTGCTGAACCAGGCCCCAGACA                  |                             |
| TGCTGCATAGATTTTATGGAAAGAACTCTTCTTATGTCCATGGGGGATTGGATTCAAATGGA <b>AAGCCAGCAGATGCAGTCTA</b> CGG         |                             |
| ACAGAAAGAAATCCAC <b>AGGAAAGTGATGTCACAAA</b> ACTTCACCAACTGCCACACCAAGATTGCGCATGTTGATGCTCATGCCAGC         |                             |
| CTAAATGATGGTGTGGTAGTCCAGGTGATGGGGCTTCTCTCTAACACACCAGGCTTTGAGGAGATTCATGCAAACGTTTGTCC                    |                             |
| TTGCTCCTGAGGGTCTGTGCAAATAAATCTATGTTTACAATGATATCTTCAGATACCAAGATGAGGTCTTTGGTGGGTTTGT                     |                             |
| CACTGAGCCTCAGGAGGAGTCTGAAGAAGAAGTAGAGGAACCTGAAGAAAGACAGCAACACCTGAGGTGGTACCTGATGATTCT                   |                             |
| GGAACCTTCTATGATCAGGCAGTGTGTCAGTAATGACATGGAAGAACATTTAGAGGAGCCTGTTGCTGAACCAGAGCCTGATCCTG                 |                             |
| AACCAGAACCAGAAACAAGAACCCTGTATCTGAAATCCAAGAGGAAAAGCCTGAGCCAGTATTAGAAGAACTGCCCTGAGGATGC                  |                             |
| TCAGAAGAGTTCTTCCAGCACCTGC <b>AGACATAGCTCAGACAGTA</b> CAGGAAGACTTGAGGACATTTCTTGGGCATCTGTGACC            |                             |
| AGTAAGAATCTTCCACCCAGTGGAGCTGTCCAGTTACTGGGATACCACCTCATGTTGTTAAAGTACCAGCTTCACAGCCCGTC                    |                             |
| CAGAGTCTAAGCCTGAATCTCAGATTCACCACAAAGACCTCAGCGGGATCAAAGAGT <b>GCGAGAACAACGAATAAAT</b> ATTCTCC           |                             |
| CCAAGGGGACCCAGACCAATCCGTGAGGCTGGTGAGCAAGGTGACATTGAACCCGAAGAATGGTGAGACACCTGACAGTCAC                     |                             |
| CAACTCTTCATTGGCAACCTGCCTCATGAAGTGGACAAATCAGAGCTTAAAGATTTCTTTCAAAGTTATGGAAAC <b>TGGTGGAGT</b>           |                             |
| <b>TGCGCATTAA</b> CAGTGGTGGGAAATACCCAATTTGGTTTTGTTGTGTTGATGATTCTGAGCCTGTTTCAGAAAGTCCTTAGCAA            |                             |
| CAGGCCATCATGTTTCAGAGGTGAGGTC <b>CGTCTGAATGTCGAAGAGA</b> AGAAGACTCGAGCTGCCAGG <b>GAAGGCGACCGACGAGAT</b> |                             |
| <b>AATCGCCTTCGGGACCTGGAGGCCCTCGAGTGGCTGGGTGGATGAGAGCCCTCCCGTGGAGGCATGGTGCAGAAAC</b>                    |                             |
| CAGGATTTGGAGTGGGAAGGGGCTTGCGCCACGGCAGTGA                                                               |                             |
| <b>Name</b>                                                                                            | <b>Target sequence</b>      |
| siG3BP1 (pool)                                                                                         | <b>GTGGTGGAGTTGCGCATTAA</b> |
|                                                                                                        | <b>AGACATAGCTCAGACAGTA</b>  |
|                                                                                                        | <b>GAAGGCGACCGACGAGATA</b>  |
|                                                                                                        | <b>GCGAGAACAACGAATAAAT</b>  |
| shG3BP1 #1                                                                                             | <b>CGTCTGAATGTCGAAGAGA</b>  |
| shG3BP1 #2                                                                                             | <b>AGGAAAGTGATGTCACAAA</b>  |
| sgG3BP1 #1                                                                                             | <b>AAGCCAGCAGATGCAGTCTA</b> |
| sgG3BP1 #2                                                                                             | <b>CCGGCGACCTTCCGGCGGGA</b> |

**Table S2. Heterozygous variants in G3BP1 or G3BP2 strongly predicted to alter protein function, identified in the GEL and Epi4K cohorts, related to Figure 7.** Rows are colored as indicated in Figure S3B according to protein domains of G3BP1 and G3BP2 in which the alterations occur.

| Column header                               | Comment                                                                                                                                                                                                                                                                                                                                                                   |        |                           |               |                                             |                                                  |                                                                                              |                                                                           |                        |
|---------------------------------------------|---------------------------------------------------------------------------------------------------------------------------------------------------------------------------------------------------------------------------------------------------------------------------------------------------------------------------------------------------------------------------|--------|---------------------------|---------------|---------------------------------------------|--------------------------------------------------|----------------------------------------------------------------------------------------------|---------------------------------------------------------------------------|------------------------|
| Gene                                        | G3BP1 or G3BP2                                                                                                                                                                                                                                                                                                                                                            |        |                           |               |                                             |                                                  |                                                                                              |                                                                           |                        |
| Protein Domain                              | Protein domains of G3BP1 and G3BP2 are indicated according to Figure S4B<br><b>GEL</b> = The National Genomics Research and Healthcare Knowledgebase v5, Genomics England. doi:10.6084/m9.figshare.4530893.v5. 2019; <b>Epi4K</b> = Epi4K data from the Duke Center for Human Genome Variation (now Institute for Genomic Medicine, Columbia University). PMID: 25262651. |        |                           |               |                                             |                                                  |                                                                                              |                                                                           |                        |
| Cohort                                      | Genome Reference Consortium Human Build 38 (2013)                                                                                                                                                                                                                                                                                                                         |        |                           |               |                                             |                                                  |                                                                                              |                                                                           |                        |
| Location (GRCh 38, Hg38)                    | Amino acid or exon modification of the variant                                                                                                                                                                                                                                                                                                                            |        |                           |               |                                             |                                                  |                                                                                              |                                                                           |                        |
| Protein                                     | Minor allele frequencies assessed by GnomAD                                                                                                                                                                                                                                                                                                                               |        |                           |               |                                             |                                                  |                                                                                              |                                                                           |                        |
| MAF (gnomAD v.2.1.1*) and number of alleles | Information on variant occurrence in the parents                                                                                                                                                                                                                                                                                                                          |        |                           |               |                                             |                                                  |                                                                                              |                                                                           |                        |
| Segregation                                 | Reported disease phenotypes                                                                                                                                                                                                                                                                                                                                               |        |                           |               |                                             |                                                  |                                                                                              |                                                                           |                        |
| Phenotype                                   | Phenotype                                                                                                                                                                                                                                                                                                                                                                 |        |                           |               |                                             |                                                  |                                                                                              |                                                                           |                        |
| Similarity TSC, TBC1D7, mTORopathy          | Overlap with phenotypes known for variants in TSC1, TSC2, TBC1D7 or genes related to mTORopathies                                                                                                                                                                                                                                                                         |        |                           |               |                                             |                                                  |                                                                                              |                                                                           |                        |
| Neurological phenotype                      | Indicates whether the reported phenotypes relate to neurological disturbances                                                                                                                                                                                                                                                                                             |        |                           |               |                                             |                                                  |                                                                                              |                                                                           |                        |
| Gene                                        | Protein domain                                                                                                                                                                                                                                                                                                                                                            | Cohort | Location (GRCh 38, Hg 38) | Protein       | MAF (gnomAD v.2.1.1*) and number of alleles | Segregation                                      | Phenotype                                                                                    | Similarity TSC, TBC1D7, mTORopathy                                        | Neurological phenotype |
| G3BP1                                       | delta acidic+ proline-rich+RRM+RGG (frameshift in NTF2L domain)                                                                                                                                                                                                                                                                                                           | GEL    | 151786716                 | Exon 2 c.95+1 | 0                                           | De novo                                          | Macrocephaly<br>Intellectual disability<br>Skeletal dysplasia<br>Gait disturbance            | Macrocephaly is characteristic of mTORopathies and TBC1D7 disease         | yes                    |
|                                             | NTF2L                                                                                                                                                                                                                                                                                                                                                                     | GEL    | 151786673                 | Q18R          | 0                                           | Parents not available                            | Functional abnormality of the bladder<br>Abnormality of eye movement<br>Ataxia<br>Dysarthria | Hypercholesterolemia<br>Peripheral neuropathy<br>Vertigo<br>Dysphagia     | yes                    |
|                                             | Acidic                                                                                                                                                                                                                                                                                                                                                                    | GEL    | 151797322                 | E212G         | 0.00001194 (3/251328)                       | Mother unaffected and does not carry the variant | Heterotopia<br>Subependymal nodules                                                          | Heterotopia and subependymal nodules are neuronal migration abnormalities | yes                    |
|                                             | RRM                                                                                                                                                                                                                                                                                                                                                                       | GEL    | 151803906                 | V406F         | 0.000003985 (1/250960)                      | Parents not available                            | Hypertension<br>Gout<br>Stage 5 chronic kidney disease                                       |                                                                           | no                     |
|                                             | delta RRM+RGG (stop in proline rich domain)                                                                                                                                                                                                                                                                                                                               | Epi4K  | 151179525                 | R307X         | 0.00003186 (1/31390)                        | De novo                                          | Epileptic encephalopathy<br>Infantile spasms                                                 | Infantile spasms and epilepsy frequent in TSC and mTORopathies            | yes                    |
|                                             | delta RRM+RGG (stop in proline rich domain)                                                                                                                                                                                                                                                                                                                               | GEL    | 151800235                 | Q325X         | 0                                           | De novo                                          | Upper limb spasticity                                                                        |                                                                           | yes                    |
|                                             | RGG                                                                                                                                                                                                                                                                                                                                                                       | GEL    | 151803987                 | G433S         | 0                                           | Parents not available                            | Dysarthria<br>Tremor<br>Weight loss                                                          | Lower limb hyperreflexia<br>Bowel incontinence<br>Fatigue                 | yes                    |
|                                             | RGG                                                                                                                                                                                                                                                                                                                                                                       | GEL    | 151804021                 | G444D         | 0                                           | Parents not available                            | Visual impairment<br>Retinal dystrophy                                                       |                                                                           | yes                    |
|                                             | Acidic                                                                                                                                                                                                                                                                                                                                                                    | GEL    | 75655786                  | Y176C         | 0.000007959 (2/251290)                      | Parents not available                            | Parkinsonism<br>Abnormal rapid eye movement sleep                                            |                                                                           | yes                    |
|                                             | RGG                                                                                                                                                                                                                                                                                                                                                                       | GEL    | 75645539                  | R447H         | 0                                           | De novo                                          | Ataxia<br>Cognitive impairment                                                               |                                                                           | yes                    |

\* location of variant converted to GRCh 37, Hg19

**Table S3. Antibody dilutions, related to STAR Methods.**

| ANTIBODIES                                                                          | DILUTION                                                                | SOURCE                   | IDENTIFIER                           |
|-------------------------------------------------------------------------------------|-------------------------------------------------------------------------|--------------------------|--------------------------------------|
| CALR                                                                                | dilution in IB 1:1000                                                   | Cell Signaling           | Cat# 12238;<br>RRID: AB_2688013      |
| CANX                                                                                | dilution in IB 1:1000                                                   | Cell Signaling           | Cat# 2679;<br>RRID: AB_2228381       |
| CTSD                                                                                | dilution in IB 1:1000                                                   | Cell Signaling           | Cat# 2284;<br>RRID: AB_10694258      |
| EEA1                                                                                | dilution in IB 1:1000                                                   | Cell Signaling           | Cat# 3288;<br>RRID: AB_2096811       |
| EIF2S1                                                                              | dilution in IB 1:1000                                                   | Cell Signaling           | Cat# 9722;<br>RRID: AB_2230924       |
| EIF2S1-pS51                                                                         | dilution in IB 1:1000                                                   | Cell Signaling           | Cat# 9721;<br>RRID: AB_330951        |
| EIF3A                                                                               | dilution in IB 1:10000<br>dilution in IF 1:1000                         | Cell Signaling           | Cat# 3411;<br>RRID: AB_2096523       |
| FLAG                                                                                | used in IP at 1 $\mu$ g/mL                                              | Sigma-Aldrich            | Cat# F3165;<br>RRID: AB_259529       |
| G3BP1                                                                               | dilution in IB 1:1000                                                   | Santa Cruz               | Cat# sc-365338;<br>RRID: AB_10846950 |
| G3BP1                                                                               | dilution in IB 1:1000<br>dilution in IF 1:200<br>dilution in PLA 1:2000 | Santa Cruz               | Cat# sc-81940;<br>RRID: AB_1123055   |
| G3BP2                                                                               | dilution in IB 1:1000                                                   | Bethyl                   | Cat# A302-040A;<br>RRID: AB_1576545  |
| GAPDH                                                                               | dilution in IB 1:10000                                                  | Abcam                    | Cat# ab37187;<br>RRID: AB_732651     |
| GAPDH (zebrafish)                                                                   | dilution in IB 1:1000                                                   | Sigma-Aldrich            | Cat# SAB2701826                      |
| GFP                                                                                 | dilution in IB 1:1000<br>used in IP at 1 $\mu$ g/mL                     | Roche                    | Cat# 11814460001;<br>RRID: AB_390913 |
| Goat anti-Mouse IgG (H+L)<br>Cross-Adsorbed Secondary<br>Antibody, Alexa Fluor 488  | dilution in IF 1:500                                                    | Invitrogen               | Cat# A-11001;<br>RRID: AB_2534069    |
| Goat anti-Rabbit IgG (H+L)<br>Cross-Adsorbed Secondary<br>Antibody, Alexa Fluor 568 | dilution in IF 1:500                                                    | Invitrogen               | Cat# A-11011;<br>RRID: AB_143157     |
| Goat anti-Mouse IgG (H+L)<br>cross-adsorbed secondary,<br>Alexa Fluor 555           | dilution in IF 1:1000                                                   | Thermo Fisher Scientific | Cat# A-21422;<br>RRID: AB_2535844    |
| Goat anti-Rabbit IgG (H+L)<br>cross-adsorbed secondary,<br>Alexa Fluor 488          | dilution in IF 1:1000                                                   | Thermo Fisher Scientific | Cat# A-11008;<br>RRID: AB_143165     |
| Goat anti-Mouse IgG (H+L)<br>Secondary Antibody, HRP-<br>coupled                    | dilution in IB 1:4000                                                   | Thermo Fisher Scientific | Cat# 31430;<br>RRID: AB_228307       |
| Goat anti-Rabbit IgG (H+L)<br>Secondary Antibody, HRP-<br>coupled                   | dilution in IB 1:4000                                                   | Thermo Fisher Scientific | Cat# 31460;<br>RRID: AB_228341       |
| Goat anti-Rabbit IgG (H+L)<br>Secondary Antibody, Dylight<br>800 (zebrafish)        | dilution in IB 1:10000                                                  | Thermo Fisher Scientific | Cat# SA5-35571;<br>RRID: AB_2556775  |
| Goat anti-Rat IgG (H+L)<br>Secondary Antibody, HRP-<br>coupled                      | dilution in IB 1:4000                                                   | Thermo Fisher Scientific | Cat# 31470;<br>RRID: AB_228356       |
| GOLGA1                                                                              | dilution in IB 1:1000                                                   | Cell Signaling           | Cat# 13192;<br>RRID: AB_2798144      |

|                                                               |                                               |                                                                   |                                      |
|---------------------------------------------------------------|-----------------------------------------------|-------------------------------------------------------------------|--------------------------------------|
| GOLGA2                                                        | dilution in IB 1:1000                         | Cell Signaling                                                    | Cat# 12480;<br>RRID: AB_2797933      |
| HA                                                            | dilution in IB 1:1000                         | Roche                                                             | Cat# 11867423001;<br>RRID: AB_390918 |
| Histone H3 (H3C1)                                             | dilution in IB 1:1000                         | Bethyl                                                            | Cat# A300-822A;<br>RRID: AB_597872   |
| HSP60 (HSPD1)                                                 | dilution in IB 1:10000                        | Cell Signaling                                                    | Cat# 12165;<br>RRID: AB_2636980      |
| HSP90 (CDC37)                                                 | dilution in IB 1:10000                        | Cell Signaling                                                    | Cat# 4877;<br>RRID: AB_2233307       |
| LMNA A/C                                                      | dilution in IB 1:10000                        | Cell Signaling                                                    | Cat# 2032;<br>RRID: AB_2136278       |
| LAMP1                                                         | dilution in IB 1:1000;                        | Cell Signaling                                                    | Cat# 9091;<br>RRID: AB_2687579       |
| LAMP1                                                         | dilution in IF 1:1000                         | Developmental Studies<br>Hybridoma Bank                           | Cat# H4A3;<br>RRID: AB_2296838       |
| LAMP2                                                         | dilution in IB 1:10000                        | Cell Signaling                                                    | Cat# 49067;<br>RRID: AB_2799349      |
| LAMP2                                                         | dilution in IB 1:1000;                        | Santa Cruz                                                        | Cat# sc-18822;<br>RRID: AB_626858    |
| LAMP2                                                         | dilution in PLA 1:200                         | Developmental Studies<br>Hybridoma Bank                           | Cat# H4B4;<br>RRID: AB_2134755       |
| MTOR                                                          | dilution in IB 1:1000<br>dilution in IF 1:200 | Cell Signaling                                                    | Cat# 2983;<br>RRID: AB_2105622       |
| MTOR epitope maps to residues 221 and 261 of human mTOR       | used in IP at 7.5 µg/mL                       | Monoclonal Antibody Core Unit. Helmholtz Zentrum München, Germany | TQREP-3G6                            |
| Mock antibody mouse                                           | used in IP at 7.5 µg/mL                       | Santa Cruz                                                        | Cat# sc-2025;<br>RRID: AB_737182     |
| Mock antibody rabbit                                          | used in IP at 7.5 µg/mL                       | Bethyl                                                            | Cat# P120-101;<br>RRID: AB_479829    |
|                                                               | used in IP from rat brains at 4 µg/mL         | Sigma-Aldrich                                                     | Cat# I5006;<br>RRID: AB_1163659      |
| Mock antibody rat                                             | used in IP at 7.5 µg/mL                       | Monoclonal Antibody Core Unit. Helmholtz Zentrum München, Germany | RmC3-7H8                             |
| Mouse IgG HRP Linked Whole Ab                                 | used in IB of lysosomal isolation 1:5000      | Merck                                                             | Cat# GENA931                         |
| MYC-tag                                                       | dilution in IB 1:1000                         | Cell Signaling                                                    | Cat# 2276;<br>RRID: AB_331783        |
| Rabbit IgG HRP Linked Whole Ab                                | used in IB of lysosomal isolation 1:5000      | Merck                                                             | Cat# GENA934;<br>RRID: AB_2722659    |
| RPS6KB1                                                       | dilution in IB 1:1000                         | Cell Signaling                                                    | Cat# 2708;<br>RRID: AB_390722        |
| RPS6KB1-pT389                                                 | dilution in IB 1:1000                         | Cell Signaling                                                    | Cat# 9206;<br>RRID: AB_2285392       |
| RPS6KB1-pT389                                                 | dilution in IB 1:1000                         | Cell Signaling                                                    | Cat# 9205;<br>RRID: AB_330944        |
| RAB5A                                                         | dilution in IB 1:1000                         | Cell Signaling                                                    | Cat# 3547;<br>RRID: AB_2300649       |
| RAB7A                                                         | dilution in IB 1:1000                         | Cell Signaling                                                    | Cat# 9367;<br>RRID: AB_1904103       |
| RPTOR                                                         | dilution in IB 1:1000                         | Cell Signaling                                                    | Cat# 2280;<br>RRID: AB_561245        |
| RPTOR #1 epitope maps to residues 686 and 704 of human Raptor | used in IP at 7.5 µg/mL                       | Monoclonal Antibody Core Unit. Helmholtz Zentrum München, Germany | RAP1-20C4                            |
| RPTOR #2                                                      | used in IP at 7.5 µg/mL                       | Bethyl                                                            | Cat# A300-553A;<br>RRID: AB_2130793  |

|                                                                    |                                                                           |                                                                                                                                 |                                     |
|--------------------------------------------------------------------|---------------------------------------------------------------------------|---------------------------------------------------------------------------------------------------------------------------------|-------------------------------------|
| RPS6                                                               | dilution in IB 1:1000                                                     | Cell Signaling                                                                                                                  | Cat# 2317;<br>RRID: AB_2238583      |
| RPS6-pS235/236                                                     | dilution in IB 1:1000                                                     | Cell Signaling                                                                                                                  | Cat# 4856;<br>RRID: AB_2181037      |
| RPS6-pS235/236<br>(zebrafish)                                      | dilution in IB 1:1000                                                     | Cell Signaling                                                                                                                  | Cat# 2211;<br>RRID: AB_331679       |
| RPS6-pS235/236<br>(zebrafish)                                      | dilution in IF 1:100                                                      | Cell Signaling                                                                                                                  | Cat# 4858;<br>RRID: AB_916156       |
| TSC1                                                               | dilution in IB 1:1000                                                     | Cell Signaling                                                                                                                  | Cat# 4906;<br>RRID: AB_2209790      |
| TSC1 #1                                                            | used in IP at 7.5 µg / mL                                                 | Gift from Michael N. Hall,<br>Basel, Switzerland (Molle,<br>2006).<br>Generated according to van<br>Slegtenhorst et al. (1998). | N/A                                 |
| TSC1 #2                                                            | used in IP at 7.5 µg / mL                                                 | Thermo Fisher Scientific<br>(Invitrogen)                                                                                        | Cat# 37-0400;<br>RRID: AB_2533292   |
| TSC1 #3                                                            | dilution in IB 1:1000<br>used in IP at 4 µg/mL                            | Cell Signaling                                                                                                                  | Cat# 6935;<br>RRID: AB_10860420     |
| TSC2                                                               | dilution in IB 1:1000;<br>dilution in IF 1:800;<br>dilution in PLA 1:1600 | Cell Signaling                                                                                                                  | Cat# 4308;<br>RRID: AB_10547134     |
| TSC2 #1                                                            | used in IP at 7.5 µg / mL                                                 | Thermo Fisher Scientific<br>(Invitrogen)                                                                                        | Cat# 37-0500;<br>RRID: AB_2533293   |
| TSC2 #2 epitope maps to<br>residues 1535 and 1784 of<br>human TSC2 | used in IP at 7.5 µg / mL                                                 | Gift from Michael N. Hall,<br>Basel, Switzerland (Molle,<br>2006).<br>Generated according to van<br>Slegtenhorst et al. (1998). | N/A                                 |
| TSC2 #3                                                            | used in IP at 7.5 µg / mL                                                 | Abcam                                                                                                                           | Cat# ab52936;<br>RRID: AB_883283    |
| TUBA1B                                                             | dilution in IB 1:10000                                                    | Abcam                                                                                                                           | Cat# ab108629;<br>RRID: AB_10866252 |
| VDAC                                                               | dilution in IB 1:1000                                                     | Cell Signaling                                                                                                                  | Cat# 4661;<br>RRID: AB_10557420     |

**Table S4. Primers, related to STAR Methods.**

| PRIMER                            | SEQUENCE                                     | SOURCE                |
|-----------------------------------|----------------------------------------------|-----------------------|
| AttB1                             | GGGGACAAGTTTGTACAAAAAAGCAGGCTCCACC           | Stefan Pusch/Eurofins |
| AttB2                             | GGGGACCACTTTGTACAAGAAAGCTGGGT                | Stefan Pusch/Eurofins |
| G3BP1_B1                          | CAAAAAAGCAGGCTCCACCATGGTGTGGAGAAGCCTAGTC     | Stefan Pusch/Eurofins |
| G3BP1_182_B2o                     | CAAGAAAGCTGGGTTGTCACTACTGACAACCTGCCTGATC     | Stefan Pusch/Eurofins |
| G3BP1_183_B1                      | CAAAAAAGCAGGCTCCACCATGGAAGAACATTTAGAGGAGCCTG | Stefan Pusch/Eurofins |
| G3BP1_332_B2o                     | CAAGAAAGCTGGGTTTCTTCGGGGTTCAATGTCAC          | Stefan Pusch/Eurofins |
| G3BP1_333_B1                      | CAAAAAAGCAGGCTCCACCATGGTGAGACACCCTGACAG      | Stefan Pusch/Eurofins |
| G3BP1_B2o                         | CAAGAAAGCTGGGTTCTGCCGTGGCGCAAG               | Stefan Pusch/Eurofins |
| G3BP1_Fw_AsiSI                    | gaggcgatcgccatggtgatggagaagcctagt            | Eurofins              |
| G3BP1_Rev_MluI                    | gcgACGCGTctgccgtggcgcaagc                    | Eurofins              |
| hG3BP1ΔRGG_F                      | gaatgtcgaagagaagaagtaagcgccgcact             | Eurofins              |
| hG3BP1ΔRGG_R                      | agtgcggccgcttacttcttctctcgacattc             | Eurofins              |
| h-G3BP2-AsiSI-F                   | GAATTCGCGATCGCCATGGTTATGGAGAAGCCAG           | Eurofins              |
| h -G3BP2-MluI -R                  | CG ACGCGT TTA GCGACGCTGTCTGTG                | Eurofins              |
| LAMP1_B1                          | CAAAAAAGCAGGCTCCACCATGGCGGCCCCCGGCAG         | Stefan Pusch/Eurofins |
| LAMP1_382_B2o                     | CAAGAAAGCTGGGTTTCATGCTGTTCTCGTCCAGCAG        | Stefan Pusch/Eurofins |
| LAMP1_383_BgIII_f                 | ATGATCAGATCTATGCTGATCCCCATCGCTGTG            | Stefan Pusch/Eurofins |
| LAMP1_383_Sall_ro                 | TACGATGTCGACGATAGTCTGGTAGCCTGCGTG            | Stefan Pusch/Eurofins |
| Myc-DDK-G3BP1_d70-483_F (ΔNTF2L)  | gctcagtgacaacccccatcgcatcgctta               | Eurofins              |
| Myc-DDK-G3BP1_d70-483_R (ΔNTF2L)  | taaggcgatcgcatggggttctcactgagc               | Eurofins              |
| Myc-DDK-G3BP1_d484-1470_F (NTF2L) | cgagtgcggccgctaaccaagacctcatct               | Eurofins              |
| Myc-DDK-G3BP1_d484-1470_R (NTF2L) | agatgaggtcttggtaagcgccgactcg                 | Eurofins              |
| sgTSC2-Exon 2-F                   | 5'- CACCGACGGAGTTTATCATCACCG                 | Invitrogen            |
| sgTSC2-Exon 2-R                   | 5'- AAACCGGTGATGATAAACTCCGTC                 | Invitrogen            |
| sgG3BP1-Exon 3-F                  | 5'- CACCGAAGCCAGCAGATGCAGTCTA                | Invitrogen            |
| sgG3BP1-Exon 3-R                  | 5'- AAAGTAGACTGCATCTGCTGGCTTC                | Invitrogen            |
| sgG3BP1#2-Exon 1-F                | 5'- CACCGTCCCGCCGAAGGTCGCCGG                 | Invitrogen            |
| sgG3BP1#2-Exon 1-R                | 5'- AAACCGGCGACCTTCCGGCGGGAC                 | Invitrogen            |

**Table S5. siRNAs and shRNAs, related to STAR Methods.**

| <b>RNA</b>                                                         | <b>SOURCE</b> | <b>IDENTIFIER</b>                                |
|--------------------------------------------------------------------|---------------|--------------------------------------------------|
| siControl (ON-TARGET plus Non-targeting Pool)                      | Dharmacon     | Cat# D-001810-10-05                              |
| siG3BP1 pool (ON-TARGET plus Human G3BP1 siRNA – SMART pool)       | Dharmacon     | Cat# L-012099-00-0020                            |
| siG3BP2 pool (ON-TARGET plus Human G3BP2 siRNA – SMART pool)       | Dharmacon     | Cat# L-015329-01-0020                            |
| siG3BP1 (siGENOME) (used for PLA experiments in <b>Figure 4A</b> ) | Dharmacon     | Cat# M-012099-02-0005                            |
| anti-Luc siRNA (used as Control in <b>Figure 4A</b> )              | Dharmacon     | Cat# D-002050-01-20                              |
| siTSC2 pool (ON-TARGET plus Human TSC2 siRNA – SMART pool)         | Dharmacon     | Cat# L-003029-00-0005                            |
| TRIPZ Inducible Lentiviral Human G3BP1 shRNA (F6 = shG3BP1 #1)     | Dharmacon     | Cat# RHS4696-200750396;<br>Cloneld: V3THS_329105 |
| TRIPZ Inducible Lentiviral Human G3BP1 shRNA (H11 = shG3BP1 #2)    | Dharmacon     | Cat# RHS4696-200753099;<br>Cloneld: V3THS_329104 |
| TRIPZ Inducible Lentiviral Non-silencing shRNA Control             | Dharmacon     | Cat# RHS4743                                     |
